# Supplementary material
Source: HighWire-hosted journal article supplement (http://dmd.aspetjournals.org/highwire/filestream/66412/field_highwire_adjunct_files/0/058420-supplemental_final.pdf)
Supplement: 058420-supplemental_final.pdf [file 058420-supplemental_final.pdf]

**Title**

**Investigation of Metabolism and Disposition of GSK1322322, a PDF Inhibitor, in Healthy Humans Using Entero-Test® For Biliary Sampling**

Authors:

Donna Mamaril-Fishman, John Zhu, Min Lin, Clive Felgate, Lori Jones, Patrick Stump, Esaie Pierre, Chester Bowen, Odin Naderer, Etienne Dumont, Parul Patel, Peter D. Gorycki, Bo Wen, Liangfu Chen, and Yanli Deng

Department of Drug Metabolism and Pharmacokinetics, GlaxoSmithKline, King of Prussia, Pennsylvania (DMF, ML, EP, CB, PDG, BW, LC, YD) and Ware, United Kingdom (CF); Department of Clinical Pharmacology Modeling and Simulation, GlaxoSmithKline, King of Prussia, Pennsylvania (JZ); Department of Projects Clinical Pharmacology and Sciences, GlaxoSmithKline, Research Triangle Park, North Carolina (LJ, PS, ON, PP) and Collegeville (ED)

**Supplemental Data**

**Introduction**

The major metabolites of GSK1322322 were structurally characterized using samples from rat isolated perfused rat liver and rat balance excretion studies using radiolabelled in vitro and in vivo studies. These studies are briefly described as follows.

## Materials and Methods

### Isolated Perfused Rat Livers (IPRL)

To characterize the major metabolites of GSK1322322 in rat bile, an isolated perfused rat liver experiment was conducted. Three male rats (Sprague-Dawley strain supplied by Charles River Laboratories, Inc., Raleigh, NC) were used in this study. Animals were surgically cannulated and connected to the perfusion apparatus using an established procedure (Curtis et al., 1971). The dose was delivered at a target dose of 30 mg/kg [<sup>14</sup>C]GSK1322322 into the constantly mixing perfusate reservoir approximately 15-30 minutes following the initiation of perfusion. Liver perfusion continued for four hours after dosing.

Post-dose bile was collected, and stored at -70°C if not in use. The biliary recovery of the total administered radioactivity was 61%, 31% and 62% from rat livers 1, 2 and 3, respectively. The weight of bile produced during the perfusion experiment by rats 1, 2 and 3 were *ca* 2.9, 1.7 and 2.3 g, respectively. All the bile samples were pooled to give a single representative sample of bile, vortex mixed and then centrifuged at *ca* 12,000 g<sub>av</sub> (Eppendorf 5415C, Brinkman Instruments, Westbury, NY) at ambient temperature for 5 minutes. The resulting supernatant was injected onto a semi-preparative column for isolation of M6 and M9. NMR analysis was used to determine their definite structures. The semi-preparative HPLC and NMR conditions for the separation and analysis are detailed in Table 1 and Table 2.

### **In Vivo Rat Bile Collection and Metabolite Characterization**

Three bile duct-cannulated (BDC) male adult Sprague Dawley rats (Hilltop Lab Animals, Inc.; Scottsdale, PA, USA) were administered orally with [<sup>14</sup>C]GSK1322322 at a nominal dose level of 100 mg/kg (dose vehicle was 1% methylcellulose) as part of a rat mass balance/excretion study (conducted at Covance Laboratories Inc. Madison, WI). The 0-24 hour rat bile was collected, pooled and mixed; the resulting sample was stored at -70° C when not in use. The pooled bile samples were thawed at room temperature and centrifuged at *ca* 3,000 g<sub>av</sub> (Eppendorf 5415C, Brinkman Instruments, Westbury, NY) at room temperature for 5 minutes to remove any particulates prior to HPLC-MS<sup>n</sup> analysis. During these analyses, radio detection was used in parallel with the mass spectrometer to assist the identification of radio-labeled drug related materials and to confirm peak assignments. The HPLC and the mass spectrometric conditions used for analyzing the samples are detailed in Table 3.

### **Results**

As summarized in Table 4 (of Supplemental Data), M6 and M9 were structurally characterized by NMR and LC-MS<sup>n</sup> analysis in these two studies, with the accurate mass data obtained during the in vivo rat study. Metabolites M1 to M4 were also characterized using accurate mass HPLC-MS<sup>n</sup>.

### **References**

Curtis CG, Powell GM, Stone SL (1971). Perfusion of the Isolated Rat Liver. *J Physiol.* **213**:14-15.

**Table 1 HPLC Conditions for the Isolation of [<sup>14</sup>C]GSK1322322 and Related Metabolites from IPRL Bile**

|                           |                                                                                                                                                                                                                                                                                                                                |     |     |
|---------------------------|--------------------------------------------------------------------------------------------------------------------------------------------------------------------------------------------------------------------------------------------------------------------------------------------------------------------------------|-----|-----|
| HPLC System:              | Agilent 1100 series                                                                                                                                                                                                                                                                                                            |     |     |
| Software Version:         | Chemstation REV B.02.01-SR1                                                                                                                                                                                                                                                                                                    |     |     |
| Column:                   | Phenomenex Synergi Polar RP-80 250x10 mm 4 $\mu$                                                                                                                                                                                                                                                                               |     |     |
| Guard Column:             | Polar 10x10mm                                                                                                                                                                                                                                                                                                                  |     |     |
| Temperature:              | Ambient                                                                                                                                                                                                                                                                                                                        |     |     |
| Solvent A:                | 25 mM Ammonium Formate pH 3.78                                                                                                                                                                                                                                                                                                 |     |     |
| Solvent B:                | Methanol                                                                                                                                                                                                                                                                                                                       |     |     |
| Flow rate:                | 4.73 mL/min                                                                                                                                                                                                                                                                                                                    |     |     |
| Solvent gradient:         | Time (min)                                                                                                                                                                                                                                                                                                                     | % A | % B |
|                           | 0                                                                                                                                                                                                                                                                                                                              | 70  | 30  |
|                           | 10                                                                                                                                                                                                                                                                                                                             | 70  | 30  |
|                           | 65                                                                                                                                                                                                                                                                                                                             | 15  | 85  |
|                           | 66                                                                                                                                                                                                                                                                                                                             | 0   | 100 |
|                           | 75                                                                                                                                                                                                                                                                                                                             | 0   | 100 |
| Sample Preparation:       | <p><u>IPRL</u>: Sample was vortexed, centrifuged and the resulting supernatant was diluted 1:1 with buffer and subsequently utilized for the HPLC separation</p> <p><u>Parent</u>: 100<math>\mu</math>L of 5mM solution were diluted with 200<math>\mu</math>L of buffer and subsequently utilized for the HPLC separation</p> |     |     |
| Injection Volume:         | <p><u>IPRL</u>: 400<math>\mu</math>L Manual Injection</p> <p><u>Parent</u>: 300<math>\mu</math>L Manual Injection</p>                                                                                                                                                                                                          |     |     |
| UV Detector [wavelength]: | Agilent 1100 series Model G1315A DAD [220, 230, 254, 280, 310 nm]                                                                                                                                                                                                                                                              |     |     |
| Fraction Collector:       | Agilent 1100 series Model G1364C Analyt-FC                                                                                                                                                                                                                                                                                     |     |     |
| Online Radiodetector:     | LabLogic $\beta$ -RAM Model 3B                                                                                                                                                                                                                                                                                                 |     |     |
| Mass Spectrometer         | ThermoQuest Finnigan LCQDuo                                                                                                                                                                                                                                                                                                    |     |     |
| Ionization mode:          | Electrospray – positive ion                                                                                                                                                                                                                                                                                                    |     |     |
| Software version:         | Xcalibur 2.0                                                                                                                                                                                                                                                                                                                   |     |     |
| Split ratio to MS:        | Approximately 1%                                                                                                                                                                                                                                                                                                               |     |     |
| Scanning mass ranges:     | 100 – 1200 (full scan MS)                                                                                                                                                                                                                                                                                                      |     |     |

**Table 2 NMR Conditions for the Analysis of GSK1322322 and its Metabolites**

|                   |                                                                                                                                                      |
|-------------------|------------------------------------------------------------------------------------------------------------------------------------------------------|
| NMR Spectrometer: | Bruker AVANCE II 700MHz                                                                                                                              |
| Software Version: | TopSpin 2.0.4                                                                                                                                        |
| Probe:            | 5 mm TCI cryoprobe                                                                                                                                   |
| Nucleus Detected: | Proton                                                                                                                                               |
| Solvent:          | 1:1 Acetonitrile-d3:D <sub>2</sub> O                                                                                                                 |
| Experiments:      | 1D <sup>1</sup> H<br>2D <sup>1</sup> H- <sup>1</sup> H gCOSY<br>2D <sup>1</sup> H- <sup>13</sup> C gHSQC<br>2D <sup>1</sup> H- <sup>13</sup> C gHMBC |

|                   |                                                           |
|-------------------|-----------------------------------------------------------|
| NMR Spectrometer: | Bruker AVANCE II 600MHz                                   |
| Software Version: | TopSpin 2.0.4                                             |
| Probe:            | 5mm TFI cryoprobe                                         |
| Nuclei Detected:  | Proton<br>Fluorine                                        |
| Solvent:          | 1:1 Acetonitrile-d3:D <sub>2</sub> O                      |
| Experiments:      | 1D <sup>1</sup> H<br>1D { <sup>1</sup> H} <sup>19</sup> F |

**Table 3 HPLC-MS Conditions for the Analysis of [<sup>14</sup>C]GSK1322322 and its Metabolites**

|                       |                                                                                              |    |     |
|-----------------------|----------------------------------------------------------------------------------------------|----|-----|
| HPLC Pump:            | Agilent 1100                                                                                 |    |     |
| Autosampler:          | CTC LC-PAL                                                                                   |    |     |
| Column:               | Synergi Polar-RP 4u, 250 x 4.6mm, 4u                                                         |    |     |
| Solvent A:            | 25mM ammonium formate, pH 3.78                                                               |    |     |
| Solvent B:            | Methanol                                                                                     |    |     |
| Flow rate:            | 1.0 mL/min                                                                                   |    |     |
| Gradient:             | Time (min)                                                                                   | %A | %B  |
|                       | 0                                                                                            | 95 | 5   |
|                       | 5                                                                                            | 95 | 5   |
|                       | 80                                                                                           | 15 | 85  |
|                       | 80.2                                                                                         | 0  | 100 |
|                       | 85                                                                                           | 0  | 100 |
|                       | 85.2                                                                                         | 95 | 5   |
|                       | 90                                                                                           | 95 | 5   |
| On-line Radiodetector | IN/US Beta Ram model 4                                                                       |    |     |
| Split ratio:          | ~10% to MS                                                                                   |    |     |
| Mass Spectrometer:    | ThermoElectron LTQ XL with Xcalibur 2.0.7<br>ThermoElectron LTQ-Orbitrap with Xcalibur 2.0.7 |    |     |
| Ionisation mode:      | Electrospray, positive ion                                                                   |    |     |

**Table 4 Summary of Structural Information for Major Metabolites of GSK1322322**

| ID                                                                                                                                               | Mass Spectral data (m/z) <sup>1</sup>                                                                                                                                               | NMR data in<br>1:1 acetonitrile-d <sub>3</sub> /D <sub>2</sub> O                                                                                                                                                                                                                                                                                                                                                                                                                                                                                                                                                                                                                                                                                                                                                                                                                                                                                                                                                                                                                                                                                                                                                                                                                                                                                                                                       |                        |                         |                         |   |    |    |   |    |    |   |   |    |   |   |    |    |   |    |    |   |    |    |   |    |    |           |      |    |    |    |    |    |    |    |             |      |    |             |      |    |    |    |    |           |      |    |      |      |    |             |      |    |      |      |    |             |      |    |           |      |    |      |       |    |      |      |    |      |           |    |      |           |    |      |      |    |   |    |
|--------------------------------------------------------------------------------------------------------------------------------------------------|-------------------------------------------------------------------------------------------------------------------------------------------------------------------------------------|--------------------------------------------------------------------------------------------------------------------------------------------------------------------------------------------------------------------------------------------------------------------------------------------------------------------------------------------------------------------------------------------------------------------------------------------------------------------------------------------------------------------------------------------------------------------------------------------------------------------------------------------------------------------------------------------------------------------------------------------------------------------------------------------------------------------------------------------------------------------------------------------------------------------------------------------------------------------------------------------------------------------------------------------------------------------------------------------------------------------------------------------------------------------------------------------------------------------------------------------------------------------------------------------------------------------------------------------------------------------------------------------------------|------------------------|-------------------------|-------------------------|---|----|----|---|----|----|---|---|----|---|---|----|----|---|----|----|---|----|----|---|----|----|-----------|------|----|----|----|----|----|----|----|-------------|------|----|-------------|------|----|----|----|----|-----------|------|----|------|------|----|-------------|------|----|------|------|----|-------------|------|----|-----------|------|----|------|-------|----|------|------|----|------|-----------|----|------|-----------|----|------|------|----|---|----|
| M1                                                                                                                                               | Full mass: 496.2666<br>MS <sup>2</sup> : 223.1229, 267.1490, 283.1678, 435.2519, 478.2572                                                                                           | NA                                                                                                                                                                                                                                                                                                                                                                                                                                                                                                                                                                                                                                                                                                                                                                                                                                                                                                                                                                                                                                                                                                                                                                                                                                                                                                                                                                                                     |                        |                         |                         |   |    |    |   |    |    |   |   |    |   |   |    |    |   |    |    |   |    |    |   |    |    |           |      |    |    |    |    |    |    |    |             |      |    |             |      |    |    |    |    |           |      |    |      |      |    |             |      |    |      |      |    |             |      |    |           |      |    |      |       |    |      |      |    |      |           |    |      |           |    |      |      |    |   |    |
| M2                                                                                                                                               | Full mass: 496.2669<br>MS <sup>2</sup> : 223.1229, 267.1490, 283.1678, 435.2517, 478.2572                                                                                           | NA                                                                                                                                                                                                                                                                                                                                                                                                                                                                                                                                                                                                                                                                                                                                                                                                                                                                                                                                                                                                                                                                                                                                                                                                                                                                                                                                                                                                     |                        |                         |                         |   |    |    |   |    |    |   |   |    |   |   |    |    |   |    |    |   |    |    |   |    |    |           |      |    |    |    |    |    |    |    |             |      |    |             |      |    |    |    |    |           |      |    |      |      |    |             |      |    |      |      |    |             |      |    |           |      |    |      |       |    |      |      |    |      |           |    |      |           |    |      |      |    |   |    |
| M3                                                                                                                                               | Full mass: 496.2668<br>MS <sup>2</sup> : 223.1229, 267.1490, 311.1628, 435.2517, 478.2572                                                                                           | NA                                                                                                                                                                                                                                                                                                                                                                                                                                                                                                                                                                                                                                                                                                                                                                                                                                                                                                                                                                                                                                                                                                                                                                                                                                                                                                                                                                                                     |                        |                         |                         |   |    |    |   |    |    |   |   |    |   |   |    |    |   |    |    |   |    |    |   |    |    |           |      |    |    |    |    |    |    |    |             |      |    |             |      |    |    |    |    |           |      |    |      |      |    |             |      |    |      |      |    |             |      |    |           |      |    |      |       |    |      |      |    |      |           |    |      |           |    |      |      |    |   |    |
| M4                                                                                                                                               | Full mass: 494.2513<br>MS <sup>2</sup> : 223.1227, 267.1487, 283.1676, 311.1623, 433.2355, 466.2574, 476.2412.                                                                      | NA                                                                                                                                                                                                                                                                                                                                                                                                                                                                                                                                                                                                                                                                                                                                                                                                                                                                                                                                                                                                                                                                                                                                                                                                                                                                                                                                                                                                     |                        |                         |                         |   |    |    |   |    |    |   |   |    |   |   |    |    |   |    |    |   |    |    |   |    |    |           |      |    |    |    |    |    |    |    |             |      |    |             |      |    |    |    |    |           |      |    |      |      |    |             |      |    |      |      |    |             |      |    |           |      |    |      |       |    |      |      |    |      |           |    |      |           |    |      |      |    |   |    |
| M6                                                                                                                                               | 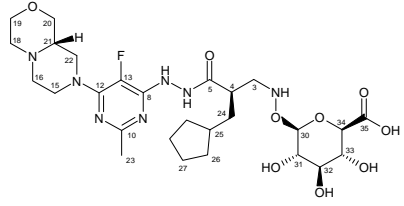 <p>Full mass: 628.3088<br/>MS<sup>2</sup>: 283.1679, 419.2566, 434.2680, 452.2784, 610.3007.</p> | <table border="1"> <thead> <tr> <th>Atom #</th> <th><sup>1</sup>H δ (ppm)</th> <th><sup>13</sup>C δ (ppm)</th> </tr> </thead> <tbody> <tr><td>3</td><td>nd</td><td>nd</td></tr> <tr><td>4</td><td>nd</td><td>nd</td></tr> <tr><td>5</td><td>•</td><td>nd</td></tr> <tr><td>8</td><td>•</td><td>nd</td></tr> <tr><td>10</td><td>•</td><td>nd</td></tr> <tr><td>12</td><td>•</td><td>nd</td></tr> <tr><td>13</td><td>•</td><td>nd</td></tr> <tr><td>15</td><td>nd &amp; 4.18</td><td>44.9</td></tr> <tr><td>16</td><td>nd</td><td>nd</td></tr> <tr><td>18</td><td>nd</td><td>nd</td></tr> <tr><td>19</td><td>3.63 &amp; 3.82</td><td>65.4</td></tr> <tr><td>20</td><td>3.27 &amp; 3.77</td><td>67.0</td></tr> <tr><td>21</td><td>nd</td><td>nd</td></tr> <tr><td>22</td><td>nd &amp; 4.06</td><td>45.6</td></tr> <tr><td>23</td><td>2.20</td><td>24.0</td></tr> <tr><td>24</td><td>1.24 &amp; 1.57</td><td>36.0</td></tr> <tr><td>25</td><td>1.83</td><td>37.0</td></tr> <tr><td>26</td><td>1.03 &amp; 1.86</td><td>31.5</td></tr> <tr><td>27</td><td>1.49 (br)</td><td>24.5</td></tr> <tr><td>30</td><td>4.49</td><td>103.7</td></tr> <tr><td>31</td><td>3.15</td><td>71.5</td></tr> <tr><td>32</td><td>3.36</td><td>ambiguous</td></tr> <tr><td>33</td><td>3.36</td><td>ambiguous</td></tr> <tr><td>34</td><td>3.53</td><td>74.1</td></tr> <tr><td>35</td><td>•</td><td>nd</td></tr> </tbody> </table> | Atom #                 | <sup>1</sup> H δ (ppm)  | <sup>13</sup> C δ (ppm) | 3 | nd | nd | 4 | nd | nd | 5 | • | nd | 8 | • | nd | 10 | • | nd | 12 | • | nd | 13 | • | nd | 15 | nd & 4.18 | 44.9 | 16 | nd | nd | 18 | nd | nd | 19 | 3.63 & 3.82 | 65.4 | 20 | 3.27 & 3.77 | 67.0 | 21 | nd | nd | 22 | nd & 4.06 | 45.6 | 23 | 2.20 | 24.0 | 24 | 1.24 & 1.57 | 36.0 | 25 | 1.83 | 37.0 | 26 | 1.03 & 1.86 | 31.5 | 27 | 1.49 (br) | 24.5 | 30 | 4.49 | 103.7 | 31 | 3.15 | 71.5 | 32 | 3.36 | ambiguous | 33 | 3.36 | ambiguous | 34 | 3.53 | 74.1 | 35 | • | nd |
|                                                                                                                                                  |                                                                                                                                                                                     | Atom #                                                                                                                                                                                                                                                                                                                                                                                                                                                                                                                                                                                                                                                                                                                                                                                                                                                                                                                                                                                                                                                                                                                                                                                                                                                                                                                                                                                                 | <sup>1</sup> H δ (ppm) | <sup>13</sup> C δ (ppm) |                         |   |    |    |   |    |    |   |   |    |   |   |    |    |   |    |    |   |    |    |   |    |    |           |      |    |    |    |    |    |    |    |             |      |    |             |      |    |    |    |    |           |      |    |      |      |    |             |      |    |      |      |    |             |      |    |           |      |    |      |       |    |      |      |    |      |           |    |      |           |    |      |      |    |   |    |
|                                                                                                                                                  |                                                                                                                                                                                     | 3                                                                                                                                                                                                                                                                                                                                                                                                                                                                                                                                                                                                                                                                                                                                                                                                                                                                                                                                                                                                                                                                                                                                                                                                                                                                                                                                                                                                      | nd                     | nd                      |                         |   |    |    |   |    |    |   |   |    |   |   |    |    |   |    |    |   |    |    |   |    |    |           |      |    |    |    |    |    |    |    |             |      |    |             |      |    |    |    |    |           |      |    |      |      |    |             |      |    |      |      |    |             |      |    |           |      |    |      |       |    |      |      |    |      |           |    |      |           |    |      |      |    |   |    |
|                                                                                                                                                  |                                                                                                                                                                                     | 4                                                                                                                                                                                                                                                                                                                                                                                                                                                                                                                                                                                                                                                                                                                                                                                                                                                                                                                                                                                                                                                                                                                                                                                                                                                                                                                                                                                                      | nd                     | nd                      |                         |   |    |    |   |    |    |   |   |    |   |   |    |    |   |    |    |   |    |    |   |    |    |           |      |    |    |    |    |    |    |    |             |      |    |             |      |    |    |    |    |           |      |    |      |      |    |             |      |    |      |      |    |             |      |    |           |      |    |      |       |    |      |      |    |      |           |    |      |           |    |      |      |    |   |    |
|                                                                                                                                                  |                                                                                                                                                                                     | 5                                                                                                                                                                                                                                                                                                                                                                                                                                                                                                                                                                                                                                                                                                                                                                                                                                                                                                                                                                                                                                                                                                                                                                                                                                                                                                                                                                                                      | •                      | nd                      |                         |   |    |    |   |    |    |   |   |    |   |   |    |    |   |    |    |   |    |    |   |    |    |           |      |    |    |    |    |    |    |    |             |      |    |             |      |    |    |    |    |           |      |    |      |      |    |             |      |    |      |      |    |             |      |    |           |      |    |      |       |    |      |      |    |      |           |    |      |           |    |      |      |    |   |    |
|                                                                                                                                                  |                                                                                                                                                                                     | 8                                                                                                                                                                                                                                                                                                                                                                                                                                                                                                                                                                                                                                                                                                                                                                                                                                                                                                                                                                                                                                                                                                                                                                                                                                                                                                                                                                                                      | •                      | nd                      |                         |   |    |    |   |    |    |   |   |    |   |   |    |    |   |    |    |   |    |    |   |    |    |           |      |    |    |    |    |    |    |    |             |      |    |             |      |    |    |    |    |           |      |    |      |      |    |             |      |    |      |      |    |             |      |    |           |      |    |      |       |    |      |      |    |      |           |    |      |           |    |      |      |    |   |    |
|                                                                                                                                                  |                                                                                                                                                                                     | 10                                                                                                                                                                                                                                                                                                                                                                                                                                                                                                                                                                                                                                                                                                                                                                                                                                                                                                                                                                                                                                                                                                                                                                                                                                                                                                                                                                                                     | •                      | nd                      |                         |   |    |    |   |    |    |   |   |    |   |   |    |    |   |    |    |   |    |    |   |    |    |           |      |    |    |    |    |    |    |    |             |      |    |             |      |    |    |    |    |           |      |    |      |      |    |             |      |    |      |      |    |             |      |    |           |      |    |      |       |    |      |      |    |      |           |    |      |           |    |      |      |    |   |    |
|                                                                                                                                                  |                                                                                                                                                                                     | 12                                                                                                                                                                                                                                                                                                                                                                                                                                                                                                                                                                                                                                                                                                                                                                                                                                                                                                                                                                                                                                                                                                                                                                                                                                                                                                                                                                                                     | •                      | nd                      |                         |   |    |    |   |    |    |   |   |    |   |   |    |    |   |    |    |   |    |    |   |    |    |           |      |    |    |    |    |    |    |    |             |      |    |             |      |    |    |    |    |           |      |    |      |      |    |             |      |    |      |      |    |             |      |    |           |      |    |      |       |    |      |      |    |      |           |    |      |           |    |      |      |    |   |    |
|                                                                                                                                                  |                                                                                                                                                                                     | 13                                                                                                                                                                                                                                                                                                                                                                                                                                                                                                                                                                                                                                                                                                                                                                                                                                                                                                                                                                                                                                                                                                                                                                                                                                                                                                                                                                                                     | •                      | nd                      |                         |   |    |    |   |    |    |   |   |    |   |   |    |    |   |    |    |   |    |    |   |    |    |           |      |    |    |    |    |    |    |    |             |      |    |             |      |    |    |    |    |           |      |    |      |      |    |             |      |    |      |      |    |             |      |    |           |      |    |      |       |    |      |      |    |      |           |    |      |           |    |      |      |    |   |    |
|                                                                                                                                                  |                                                                                                                                                                                     | 15                                                                                                                                                                                                                                                                                                                                                                                                                                                                                                                                                                                                                                                                                                                                                                                                                                                                                                                                                                                                                                                                                                                                                                                                                                                                                                                                                                                                     | nd & 4.18              | 44.9                    |                         |   |    |    |   |    |    |   |   |    |   |   |    |    |   |    |    |   |    |    |   |    |    |           |      |    |    |    |    |    |    |    |             |      |    |             |      |    |    |    |    |           |      |    |      |      |    |             |      |    |      |      |    |             |      |    |           |      |    |      |       |    |      |      |    |      |           |    |      |           |    |      |      |    |   |    |
|                                                                                                                                                  |                                                                                                                                                                                     | 16                                                                                                                                                                                                                                                                                                                                                                                                                                                                                                                                                                                                                                                                                                                                                                                                                                                                                                                                                                                                                                                                                                                                                                                                                                                                                                                                                                                                     | nd                     | nd                      |                         |   |    |    |   |    |    |   |   |    |   |   |    |    |   |    |    |   |    |    |   |    |    |           |      |    |    |    |    |    |    |    |             |      |    |             |      |    |    |    |    |           |      |    |      |      |    |             |      |    |      |      |    |             |      |    |           |      |    |      |       |    |      |      |    |      |           |    |      |           |    |      |      |    |   |    |
|                                                                                                                                                  |                                                                                                                                                                                     | 18                                                                                                                                                                                                                                                                                                                                                                                                                                                                                                                                                                                                                                                                                                                                                                                                                                                                                                                                                                                                                                                                                                                                                                                                                                                                                                                                                                                                     | nd                     | nd                      |                         |   |    |    |   |    |    |   |   |    |   |   |    |    |   |    |    |   |    |    |   |    |    |           |      |    |    |    |    |    |    |    |             |      |    |             |      |    |    |    |    |           |      |    |      |      |    |             |      |    |      |      |    |             |      |    |           |      |    |      |       |    |      |      |    |      |           |    |      |           |    |      |      |    |   |    |
|                                                                                                                                                  |                                                                                                                                                                                     | 19                                                                                                                                                                                                                                                                                                                                                                                                                                                                                                                                                                                                                                                                                                                                                                                                                                                                                                                                                                                                                                                                                                                                                                                                                                                                                                                                                                                                     | 3.63 & 3.82            | 65.4                    |                         |   |    |    |   |    |    |   |   |    |   |   |    |    |   |    |    |   |    |    |   |    |    |           |      |    |    |    |    |    |    |    |             |      |    |             |      |    |    |    |    |           |      |    |      |      |    |             |      |    |      |      |    |             |      |    |           |      |    |      |       |    |      |      |    |      |           |    |      |           |    |      |      |    |   |    |
|                                                                                                                                                  |                                                                                                                                                                                     | 20                                                                                                                                                                                                                                                                                                                                                                                                                                                                                                                                                                                                                                                                                                                                                                                                                                                                                                                                                                                                                                                                                                                                                                                                                                                                                                                                                                                                     | 3.27 & 3.77            | 67.0                    |                         |   |    |    |   |    |    |   |   |    |   |   |    |    |   |    |    |   |    |    |   |    |    |           |      |    |    |    |    |    |    |    |             |      |    |             |      |    |    |    |    |           |      |    |      |      |    |             |      |    |      |      |    |             |      |    |           |      |    |      |       |    |      |      |    |      |           |    |      |           |    |      |      |    |   |    |
|                                                                                                                                                  |                                                                                                                                                                                     | 21                                                                                                                                                                                                                                                                                                                                                                                                                                                                                                                                                                                                                                                                                                                                                                                                                                                                                                                                                                                                                                                                                                                                                                                                                                                                                                                                                                                                     | nd                     | nd                      |                         |   |    |    |   |    |    |   |   |    |   |   |    |    |   |    |    |   |    |    |   |    |    |           |      |    |    |    |    |    |    |    |             |      |    |             |      |    |    |    |    |           |      |    |      |      |    |             |      |    |      |      |    |             |      |    |           |      |    |      |       |    |      |      |    |      |           |    |      |           |    |      |      |    |   |    |
|                                                                                                                                                  |                                                                                                                                                                                     | 22                                                                                                                                                                                                                                                                                                                                                                                                                                                                                                                                                                                                                                                                                                                                                                                                                                                                                                                                                                                                                                                                                                                                                                                                                                                                                                                                                                                                     | nd & 4.06              | 45.6                    |                         |   |    |    |   |    |    |   |   |    |   |   |    |    |   |    |    |   |    |    |   |    |    |           |      |    |    |    |    |    |    |    |             |      |    |             |      |    |    |    |    |           |      |    |      |      |    |             |      |    |      |      |    |             |      |    |           |      |    |      |       |    |      |      |    |      |           |    |      |           |    |      |      |    |   |    |
|                                                                                                                                                  |                                                                                                                                                                                     | 23                                                                                                                                                                                                                                                                                                                                                                                                                                                                                                                                                                                                                                                                                                                                                                                                                                                                                                                                                                                                                                                                                                                                                                                                                                                                                                                                                                                                     | 2.20                   | 24.0                    |                         |   |    |    |   |    |    |   |   |    |   |   |    |    |   |    |    |   |    |    |   |    |    |           |      |    |    |    |    |    |    |    |             |      |    |             |      |    |    |    |    |           |      |    |      |      |    |             |      |    |      |      |    |             |      |    |           |      |    |      |       |    |      |      |    |      |           |    |      |           |    |      |      |    |   |    |
|                                                                                                                                                  |                                                                                                                                                                                     | 24                                                                                                                                                                                                                                                                                                                                                                                                                                                                                                                                                                                                                                                                                                                                                                                                                                                                                                                                                                                                                                                                                                                                                                                                                                                                                                                                                                                                     | 1.24 & 1.57            | 36.0                    |                         |   |    |    |   |    |    |   |   |    |   |   |    |    |   |    |    |   |    |    |   |    |    |           |      |    |    |    |    |    |    |    |             |      |    |             |      |    |    |    |    |           |      |    |      |      |    |             |      |    |      |      |    |             |      |    |           |      |    |      |       |    |      |      |    |      |           |    |      |           |    |      |      |    |   |    |
|                                                                                                                                                  |                                                                                                                                                                                     | 25                                                                                                                                                                                                                                                                                                                                                                                                                                                                                                                                                                                                                                                                                                                                                                                                                                                                                                                                                                                                                                                                                                                                                                                                                                                                                                                                                                                                     | 1.83                   | 37.0                    |                         |   |    |    |   |    |    |   |   |    |   |   |    |    |   |    |    |   |    |    |   |    |    |           |      |    |    |    |    |    |    |    |             |      |    |             |      |    |    |    |    |           |      |    |      |      |    |             |      |    |      |      |    |             |      |    |           |      |    |      |       |    |      |      |    |      |           |    |      |           |    |      |      |    |   |    |
|                                                                                                                                                  |                                                                                                                                                                                     | 26                                                                                                                                                                                                                                                                                                                                                                                                                                                                                                                                                                                                                                                                                                                                                                                                                                                                                                                                                                                                                                                                                                                                                                                                                                                                                                                                                                                                     | 1.03 & 1.86            | 31.5                    |                         |   |    |    |   |    |    |   |   |    |   |   |    |    |   |    |    |   |    |    |   |    |    |           |      |    |    |    |    |    |    |    |             |      |    |             |      |    |    |    |    |           |      |    |      |      |    |             |      |    |      |      |    |             |      |    |           |      |    |      |       |    |      |      |    |      |           |    |      |           |    |      |      |    |   |    |
| 27                                                                                                                                               | 1.49 (br)                                                                                                                                                                           | 24.5                                                                                                                                                                                                                                                                                                                                                                                                                                                                                                                                                                                                                                                                                                                                                                                                                                                                                                                                                                                                                                                                                                                                                                                                                                                                                                                                                                                                   |                        |                         |                         |   |    |    |   |    |    |   |   |    |   |   |    |    |   |    |    |   |    |    |   |    |    |           |      |    |    |    |    |    |    |    |             |      |    |             |      |    |    |    |    |           |      |    |      |      |    |             |      |    |      |      |    |             |      |    |           |      |    |      |       |    |      |      |    |      |           |    |      |           |    |      |      |    |   |    |
| 30                                                                                                                                               | 4.49                                                                                                                                                                                | 103.7                                                                                                                                                                                                                                                                                                                                                                                                                                                                                                                                                                                                                                                                                                                                                                                                                                                                                                                                                                                                                                                                                                                                                                                                                                                                                                                                                                                                  |                        |                         |                         |   |    |    |   |    |    |   |   |    |   |   |    |    |   |    |    |   |    |    |   |    |    |           |      |    |    |    |    |    |    |    |             |      |    |             |      |    |    |    |    |           |      |    |      |      |    |             |      |    |      |      |    |             |      |    |           |      |    |      |       |    |      |      |    |      |           |    |      |           |    |      |      |    |   |    |
| 31                                                                                                                                               | 3.15                                                                                                                                                                                | 71.5                                                                                                                                                                                                                                                                                                                                                                                                                                                                                                                                                                                                                                                                                                                                                                                                                                                                                                                                                                                                                                                                                                                                                                                                                                                                                                                                                                                                   |                        |                         |                         |   |    |    |   |    |    |   |   |    |   |   |    |    |   |    |    |   |    |    |   |    |    |           |      |    |    |    |    |    |    |    |             |      |    |             |      |    |    |    |    |           |      |    |      |      |    |             |      |    |      |      |    |             |      |    |           |      |    |      |       |    |      |      |    |      |           |    |      |           |    |      |      |    |   |    |
| 32                                                                                                                                               | 3.36                                                                                                                                                                                | ambiguous                                                                                                                                                                                                                                                                                                                                                                                                                                                                                                                                                                                                                                                                                                                                                                                                                                                                                                                                                                                                                                                                                                                                                                                                                                                                                                                                                                                              |                        |                         |                         |   |    |    |   |    |    |   |   |    |   |   |    |    |   |    |    |   |    |    |   |    |    |           |      |    |    |    |    |    |    |    |             |      |    |             |      |    |    |    |    |           |      |    |      |      |    |             |      |    |      |      |    |             |      |    |           |      |    |      |       |    |      |      |    |      |           |    |      |           |    |      |      |    |   |    |
| 33                                                                                                                                               | 3.36                                                                                                                                                                                | ambiguous                                                                                                                                                                                                                                                                                                                                                                                                                                                                                                                                                                                                                                                                                                                                                                                                                                                                                                                                                                                                                                                                                                                                                                                                                                                                                                                                                                                              |                        |                         |                         |   |    |    |   |    |    |   |   |    |   |   |    |    |   |    |    |   |    |    |   |    |    |           |      |    |    |    |    |    |    |    |             |      |    |             |      |    |    |    |    |           |      |    |      |      |    |             |      |    |      |      |    |             |      |    |           |      |    |      |       |    |      |      |    |      |           |    |      |           |    |      |      |    |   |    |
| 34                                                                                                                                               | 3.53                                                                                                                                                                                | 74.1                                                                                                                                                                                                                                                                                                                                                                                                                                                                                                                                                                                                                                                                                                                                                                                                                                                                                                                                                                                                                                                                                                                                                                                                                                                                                                                                                                                                   |                        |                         |                         |   |    |    |   |    |    |   |   |    |   |   |    |    |   |    |    |   |    |    |   |    |    |           |      |    |    |    |    |    |    |    |             |      |    |             |      |    |    |    |    |           |      |    |      |      |    |             |      |    |      |      |    |             |      |    |           |      |    |      |       |    |      |      |    |      |           |    |      |           |    |      |      |    |   |    |
| 35                                                                                                                                               | •                                                                                                                                                                                   | nd                                                                                                                                                                                                                                                                                                                                                                                                                                                                                                                                                                                                                                                                                                                                                                                                                                                                                                                                                                                                                                                                                                                                                                                                                                                                                                                                                                                                     |                        |                         |                         |   |    |    |   |    |    |   |   |    |   |   |    |    |   |    |    |   |    |    |   |    |    |           |      |    |    |    |    |    |    |    |             |      |    |             |      |    |    |    |    |           |      |    |      |      |    |             |      |    |      |      |    |             |      |    |           |      |    |      |       |    |      |      |    |      |           |    |      |           |    |      |      |    |   |    |
| <p>F13= -169.1 ppm<br/>Many signals broadened and/or doubled due to dynamic processes whose rate occurs at or near that of the NMR timescale</p> |                                                                                                                                                                                     |                                                                                                                                                                                                                                                                                                                                                                                                                                                                                                                                                                                                                                                                                                                                                                                                                                                                                                                                                                                                                                                                                                                                                                                                                                                                                                                                                                                                        |                        |                         |                         |   |    |    |   |    |    |   |   |    |   |   |    |    |   |    |    |   |    |    |   |    |    |           |      |    |    |    |    |    |    |    |             |      |    |             |      |    |    |    |    |           |      |    |      |      |    |             |      |    |      |      |    |             |      |    |           |      |    |      |       |    |      |      |    |      |           |    |      |           |    |      |      |    |   |    |

| ID              | Mass Spectral data (m/z) <sup>1</sup>                                                                                                                              | NMR data in<br>1:1 acetonitrile-d <sub>3</sub> /D <sub>2</sub> O |                                                                                                                       |                         |
|-----------------|--------------------------------------------------------------------------------------------------------------------------------------------------------------------|------------------------------------------------------------------|-----------------------------------------------------------------------------------------------------------------------|-------------------------|
|                 |                                                                                                                                                                    | Atom #                                                           | <sup>1</sup> H δ (ppm)                                                                                                | <sup>13</sup> C δ (ppm) |
| M9 <sup>2</sup> | 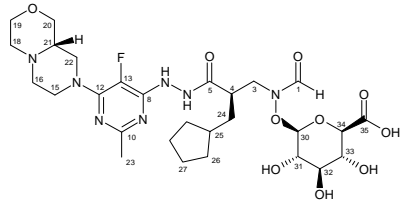 <p>Full mass: 656.3041<br/>MS<sup>2</sup>: 223, 267, 293, 446, 462, 480, 638</p> | 1                                                                | 7.80                                                                                                                  | 161.1                   |
|                 |                                                                                                                                                                    | 3                                                                | 3.37 & 3.77                                                                                                           | 51.9                    |
|                 |                                                                                                                                                                    | 4                                                                | 3.20                                                                                                                  | 41.2                    |
|                 |                                                                                                                                                                    | 5                                                                | •                                                                                                                     | nd                      |
|                 |                                                                                                                                                                    | 8                                                                | •                                                                                                                     | nd                      |
|                 |                                                                                                                                                                    | 10                                                               | •                                                                                                                     | nd                      |
|                 |                                                                                                                                                                    | 12                                                               | •                                                                                                                     | nd                      |
|                 |                                                                                                                                                                    | 13                                                               | •                                                                                                                     | nd                      |
|                 |                                                                                                                                                                    | 15                                                               | nd & 4.20                                                                                                             | 44.6                    |
|                 |                                                                                                                                                                    | 16                                                               | nd                                                                                                                    | nd                      |
|                 |                                                                                                                                                                    | 18                                                               | nd                                                                                                                    | nd                      |
|                 |                                                                                                                                                                    | 19                                                               | 3.65 & 3.85                                                                                                           | 65.1                    |
|                 |                                                                                                                                                                    | 20                                                               | 3.32 & 3.80                                                                                                           | 66.7                    |
|                 |                                                                                                                                                                    | 21                                                               | nd                                                                                                                    | nd                      |
|                 |                                                                                                                                                                    | 22                                                               | nd & 4.09                                                                                                             | 45.3                    |
|                 |                                                                                                                                                                    | 23                                                               | 2.19                                                                                                                  | 24.1                    |
|                 |                                                                                                                                                                    | 24                                                               | 1.24 & 1.56                                                                                                           | 35.6                    |
|                 |                                                                                                                                                                    | 25                                                               | 1.85                                                                                                                  | 36.9                    |
|                 |                                                                                                                                                                    | 26                                                               | 1.02 & 1.89                                                                                                           | 31.6                    |
|                 |                                                                                                                                                                    | 27                                                               | 1.50 (br)                                                                                                             | 24.5                    |
| 30              | 4.99                                                                                                                                                               | 105.2                                                            |                                                                                                                       |                         |
| 31              | 3.31                                                                                                                                                               | ambiguous                                                        |                                                                                                                       |                         |
| 32              | ambiguous                                                                                                                                                          | ambiguous                                                        |                                                                                                                       |                         |
| 33              | ambiguous                                                                                                                                                          | ambiguous                                                        |                                                                                                                       |                         |
| 34              | ambiguous                                                                                                                                                          | ambiguous                                                        |                                                                                                                       |                         |
| 35              | •                                                                                                                                                                  | nd                                                               |                                                                                                                       |                         |
|                 |                                                                                                                                                                    |                                                                  | F13= -169.3 ppm                                                                                                       |                         |
|                 |                                                                                                                                                                    |                                                                  | Many signals broadened and/or doubled due to dynamic processes whose rate occurs at or near that of the NMR timescale |                         |

1. Positive ion, if accurate mass, the experimental masses are within 5ppm accuracy from theoretical masses, unless noted specifically.
2. MS<sup>2</sup> of M9 is nominal mass.
3. NA- no analyzed.
